# Supplementary material
Source: PubMed Central journal article supplement (PMC1180766)

**F (rest)**

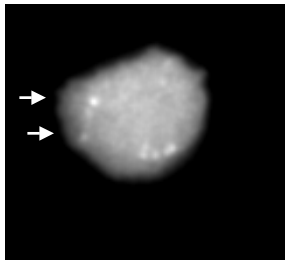

**$\Delta F/F$  (50 ms)**

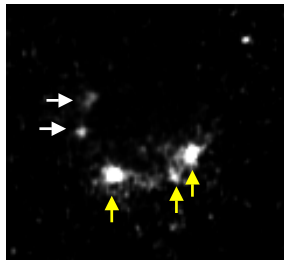

**$\Delta F/F$  (600 ms)**

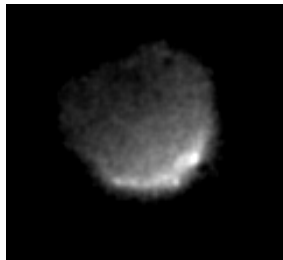

**Merge**

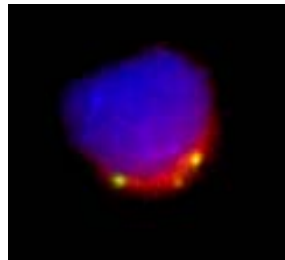

**5  $\mu\text{m}$**

Supplement: pnas_0501961102_1.pdf [file pnas_0501961102_1.pdf]
